# Supplementary material for: Efficacy and Safety of Ablative Fractional Laser-Assisted Delivery of Methotrexate in Adults with Localized Scleroderma: A Randomized and Controlled Clinical Trial
Source: MDPI journal article supplement (doi:10.3390/pharmaceutics14112261), 2022-10-22
Supplement: s1 [file s1]

**Supplemental data:**

Supplemental Table S1. The dermal thickness on left and right back of skin lesions of mice at 2 weeks after 4 times treatments. The untreated left back skin lesions are used as self-blank control(CT). And the skin lesions treated with Er:YAG fractional laser assisted delivery of drug on the right back are laser group(LS).  $\Delta d$  is the difference value of the dermal thickness of skin lesions between left and right back. Five mice in Blank control group(group 1) were injected by the 100 $\mu$ l PBS solution on both sides of the back daily until three weeks. After that, Group 1 was treated with AFL assisted delivery of MTX(dose of 1ml, concentration of 20mg/ml) and encapsulated for 5 hours weekly until four weeks. Model groups of mice(group 2 and 3, five mice, respectively) were injected subcutaneously by 100 $\mu$ l of bleomycin solution(dissolved in PBS solution, 0.2mg/ml)on both sides of the back daily until 3 weeks. After laser treatment, Group 2 was treated with 1ml of 0.9%NaCl solution and Group 3 was treated with 1ml of methotrexate solution(20mg/ml) weekly until four weeks. Data was expressed as average $\pm$ standard deviation. Values of  $p < 0.05$  were considered statistically significant.

| Dermal thicness(mm) | CT                | LS                | $\Delta d$        | P value |
|---------------------|-------------------|-------------------|-------------------|---------|
| Group 1             | 0.532 $\pm$ 0.031 | 0.527 $\pm$ 0.015 | 0.031 $\pm$ 0.018 | 0.801   |
| Group 2             | 0.727 $\pm$ 0.066 | 0.621 $\pm$ 0.032 | 0.106 $\pm$ 0.039 | 0.004   |
| Group 3             | 0.720 $\pm$ 0.033 | 0.618 $\pm$ 0.091 | 0.102 $\pm$ 0.078 | 0.043   |
